# Supplementary material for: Visual Field Outcomes for the Idiopathic Intracranial Hypertension Treatment Trial (IIHTT)
Source: PubMed Central journal article supplement — Invest Ophthalmol Vis Sci. 2016 Mar 1;57(3):805–12. doi: 10.1167/iovs.15-18626 (PMC4777274; doi:10.1167/iovs.15-18626), 2016-03-01
Supplement: i1552-5783-57-3-805-s01.pdf [file i1552-5783-57-3-805-s01.pdf]

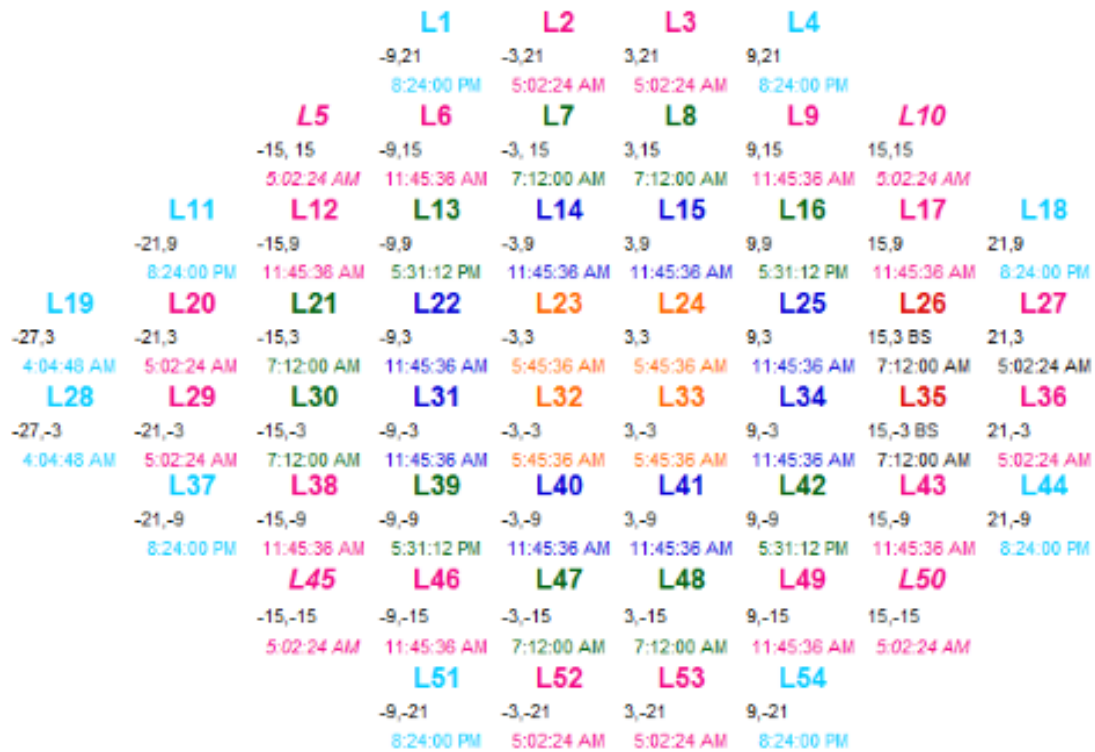

Figure e1. Key to concentric zone analysis. L1 to L54 denote test locations in right eye format from upper right to lower left. Below this are the (x, y) coordinates of the test locations, below which is the distance from fixation in degrees. The zones are grouped by approximate distance from fixation.
